# Supplementary material
Source: Springer Nature journal article supplement (https://www.springermedizin.de/resource/supplementary/13550_2013_183_MOESM4_ESM.pdf/9687782)

1. Diffuse  
pattern

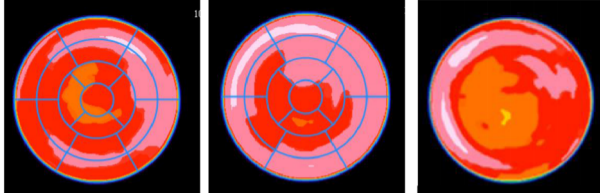

2. The basal  
ring-like  
and/or lateral  
pattern

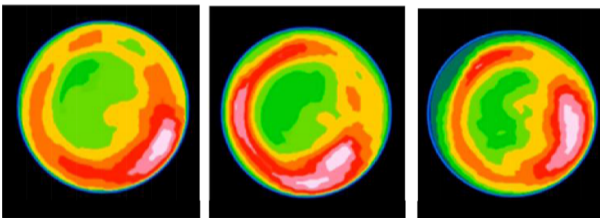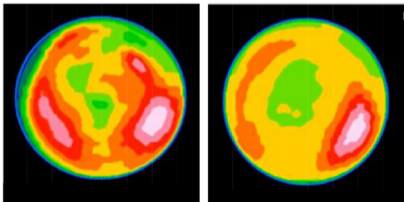

Supplement: MOESM4 [file 9687782]
